## **Pupillary dilations of mice performing a vibrotactile discrimination task reflect task engagement and response confidence.**

Ganea DA<sup>1,2,3</sup>, Bexter A<sup>5</sup>, Guenther M<sup>1,2,3</sup>, Garderes PM<sup>1,2,3,4</sup>, Kampa BM<sup>5,6</sup>, Haiss F<sup>1,2,3,4</sup>

<sup>1</sup> IZKF, Medical Faculty RWTH Aachen University, 52074, Aachen, Germany

<sup>2</sup> Institute of Neuropathology, RWTH Aachen University, 52074, Aachen, Germany

<sup>3</sup> Department of Ophthalmology, RWTH Aachen University, 52074, Aachen, Germany

<sup>4</sup> Unit of Neural Circuits Dynamics and Decision Making, Institut Pasteur, 75015, Paris, France

<sup>5</sup> Department of Neurophysiology, Institute of Zoology, RWTH Aachen University, 52074, Aachen, Germany

<sup>6</sup> JARA-BRAIN Institute Molecular Neuroscience and Neuroimaging, Forschungszentrum, 52425, Juelich, Germany

**Corresponding authors:** Dan Alin Ganea, IZKF, Medical Faculty RWTH Aachen University, 52074, Aachen, Germany.

Email: [dganea@ukaachen.de](mailto:dganea@ukaachen.de); Florent Haiss, Unit of Neural Circuits Dynamics and Decision Making, Institut Pasteur,

75015, Paris, France. Email: [florent.haiss@pasteur.fr](mailto:florent.haiss@pasteur.fr)

## **Abstract**

Pupillometry, the measure of pupil size and reactivity, has been widely used to assess cognitive processes. As such, changes in pupil size have been shown to correlate with arousal, locomotion, cortical state and decision-making processes. In addition, pupillary responses have been linked to the activity of neuromodulatory systems that modulate attention and perception as the noradrenergic and cholinergic systems. Due to the extent of processes reflected by the pupil, we aimed at resolving pupillary responses in context of behavioral state and task performance while recording pupillary transients of mice performing a vibrotactile two-alternative forced choice task (2-AFC). We show that pre-stimulus pupil size differentiates between states disengagement from task performance versus when actively engaged. In addition, when actively engaged, post-stimulus, pupillary dilations for correct responses are larger than for error responses with this difference reflecting response confidence. Importantly, in a delayed 2-AFC task we show that even though pupillary transients mainly reflect motor output following the response of the animal, they also reflect animal decision confidence prior to its response. Finally, in a condition of passive engagement, when stimulus has no task relevance with reward provided automatically, pupillary dilations rather reflect stimulation and reward and are reduced relative to a state of active engagement explained by shifts of attention from irrelevant task occurrences.

Our results provide further evidence of how pupillary dilations reflect cognitive processes in a task relevant context, showing that the pupil reflects response confidence and baseline pupil size encodes attentiveness rather than general arousal.

## **Introduction**

Pupillometry has been widely used to assess cognitive processes. When observed under constant light conditions, changes in pupil size are reflecting underlying brain activity, presumably mainly as a proxy to Locus Coeruleus (LC) processing (Aston-Jones and Cohen, 2005; Murphy et al., 2014a; Reimer et al., 2016). Though there is evidence that also links pupillary dilations to Colliculi and Cingulate cortex activity, but at an increased latency to LC (Joshi et al., 2016). In rodents the cholinergic system has also been shown to correlate with pupillary dilations (Reimer et al., 2016). Such changes in pupil size have been shown to reflect emotional arousal and alertness (Hess and Polt, 1960; Bradley et al., 2008; Vinck et al., 2015), correlate with bouts of locomotion (McGinley et al., 2015; Mineault et al., 2016; Shimaoka et al., 2018), and correlate with synchronized cortical activity (Reimer et al., 2014). Pupil size also indicates optimal performance (McGinley et al., 2015; Schriver et al., 2018) since it is taken as a proxy of arousal states that modulate cortical activity and signal processing involved in decision making in rodents (Mineault et al., 2016; McGinley et al., 2015) and humans (Murphy et al., 2014b) exhibiting a U-shaped relationship between baseline pupil size and performance levels. This U-shaped relationship has also been proposed for LC tonic firing levels (Aston-Jones et al., 1999; Usher et al., 1999). This correlates with tonic and phasic LC activity and the LC-NE theory of adaptive gain (Aston-Jones & Cohen, 2005). A tonic LC state would result in overall small or larger pupil size, unresponsive to task events, while phasic LC state would result in lower baseline pupil size that reflects task relevant events (Aston-Jones et al., 1994; Aston-Jones et al., 1999; Usher et al., 1999; Clayton et al., 2004). Pupil dilations are also a marker of perceptual selection or states of attention switching, indicating as to what underlying cognitive substrate is being perceived (Einhäuser et al., 2008). In addition, when human subjects are actively engaged in a task, such changes in pupil size correlate with an increase in mental effort and cognitive load (Hess and Polt, 1964; Kahneman and Beatty, 1966; Kahneman and Beatty, 1967; Beatty, 1982b) and reflect decision related processes (Preuschoff et al., 2011; Fiedler and Glöckner, 2012; Kloosterman et al., 2015; de Gee et al., 2017) with the decision related component shown to hold information regarding the choice that ends the decision process (Einhäuser et al., 2010) but also decision related information prior to the decision related response (de Gee et al., 2014). Since pupillary responses were shown to occur in response to a variety of behaviors, attention states and overall cognitive function, we aimed at further resolving pupillary dilations during task related behavior in mice. Combining a vibrotactile two alternative forced choice task (2-AFC) together with pupillometry allowed us to

monitor pupillary dilations in context of specific behavioral states as reflected by the degree of task engagement, and levels of task performance as a function of varying difficulty.

Our results show that when subjects are actively engaged with the performance of a task, arousal levels do not influence performance. In addition, pupillary dilations show two distinct epochs. A pre-response phase being a marker of response confidence, continuously reflecting confidence until response time and varying with task difficulty. And a post-response phase, exhibiting a marked dilation relative to the pre-response component that is locked to the response and mainly reflects the motor component of the response.

## **Results**

*Pre-stimulus pupillary size of mice performing a 2-AFC task reflects task engagement state and holds no information regarding subsequent performance.*

The pupil of mice was tracked while performing a 2-AFC task (Fig 1A and B). Pupil size was observed to fluctuate throughout the session and through each individual trial (Fig 1C). It is known that locomotion correlates with an increase in pupil size (McGinley et al. 2015; Vinck et al. 2015; Mineault et al. 2016). Our data also shows this phenomenon, with pupillary responses being dominated by larger dilations when the animal is locomotive (Fig 1D). As we wanted to examine pupillary dilations in respect to task performance, all locomotion corresponding trials were removed from analysis to avoid contamination of the pupillary response to the task by locomotive states. When performing a 2-AFC task there are three different possible response types: correct, error and miss (no response) with correct and error categorizing behavior into a task engaged state and miss trials indicating a task disengaged state. Mice showed a high degree of task engagement, represented by their consistent response to the presented stimuli throughout each session ( $84.1 \pm 4.9\%$  of all trials), receiving a reward for correct responses or no reward for error responses (Fig 1D). However, the miss condition could be separated into two different types of behaviors, sparse miss responses during extensive periods of engagement (attentive period) or as a batch at the end of the session (non-attentive period). It is possible for these separate miss responses to have a different pupillary phenotype. As such a cutoff criterion was used when 50% of the trials within a 10 trial window consisted as miss. Miss trials before this cutoff were categorized as being during an attentive period and miss trials following this were categorized as being during a non-attentive period. In addition, the 2-AFC task enabled us to separate performance for different stimuli in easy and difficult task categories while tracking pupil dilations for these categories (Fig 1E).

In the period prior to stimulus onset (baseline period) pupillary dilation traces revealed a significant difference between the four response conditions for the average baseline pupil dilation trace (Fig 2A;  $F(3,20060)=321.74$ ,  $p<0.001$ ), with mice that are in a state of disengagement from task performance having a baseline pupil size larger than when in the engaged states with no difference in baseline pupillary size for correct and error responses ( $M_{(\text{correct})}=0.977 \pm 0.001$ ;  $M_{(\text{error})}=0.972 \pm 0.002$ ) but a significant difference for the attentive and non-attentive miss conditions ( $M_{(\text{attentive miss})}=1.048 \pm 0.001$ ;  $M_{(\text{non-attentive miss})}=1.029 \pm 0.002$ ). The observed difference in both baseline size

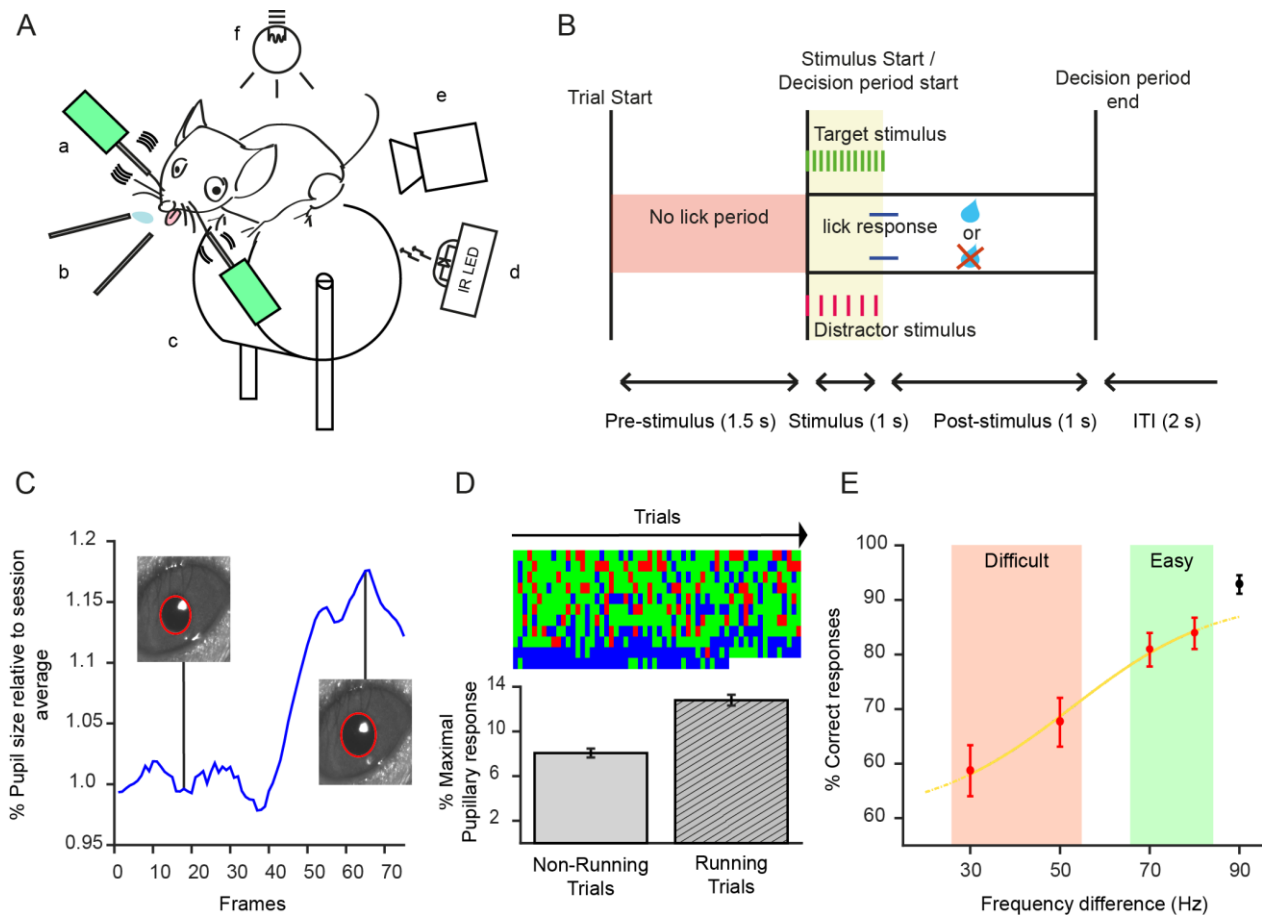

Figure 1. 2-AFC task and pupillometry overview.

(A) Experimental setup. a - whisker stimulators; b - water spouts; c - wheel; d - IR LED illumination; e - pupil tracking camera. f – setup ambient illumination. (B) Schematic of a trial sequence for the 2-AFC task used to test animal behavior. (C) Example of a pupillary dilation trace for one behavioral trial. Pupillary trace shown in blue. Insets: examples of pupil detection for two different frames. Recording duration 2.5 seconds. (D) *top* - Example of animal responses (correct - green, error - red, miss - blue) during the performance of the 2-AFC task for a single session. Each row represents 60 trials; *bottom* - Quantification of pupil dilation for non-running and running trials. (E) Example psychometric response curve for one animal.

and pupillary transient between the attentive and non-attentive miss responses might arise due to a history dependence of the dilations. Indeed, in the non-attentive state the pupil is constantly enlarged during repeated miss trials (Fig. 1D and 2B). However, in the attentive state, miss trials occur rarely (Fig 1D). To analyze the history of increased pupil size during miss trials we looked into the trials preceding a miss trial (Fig 2C). To reduce the effect of different trial conditions on pupil size, we restricted our analysis to correct trials preceding a miss trial. However, similar results were observed when restricting to miss after error trials (data not shown). We found, in the attentive state, that miss trials occur with fast switches in pupil size starting at the end of the previous trial and reaching

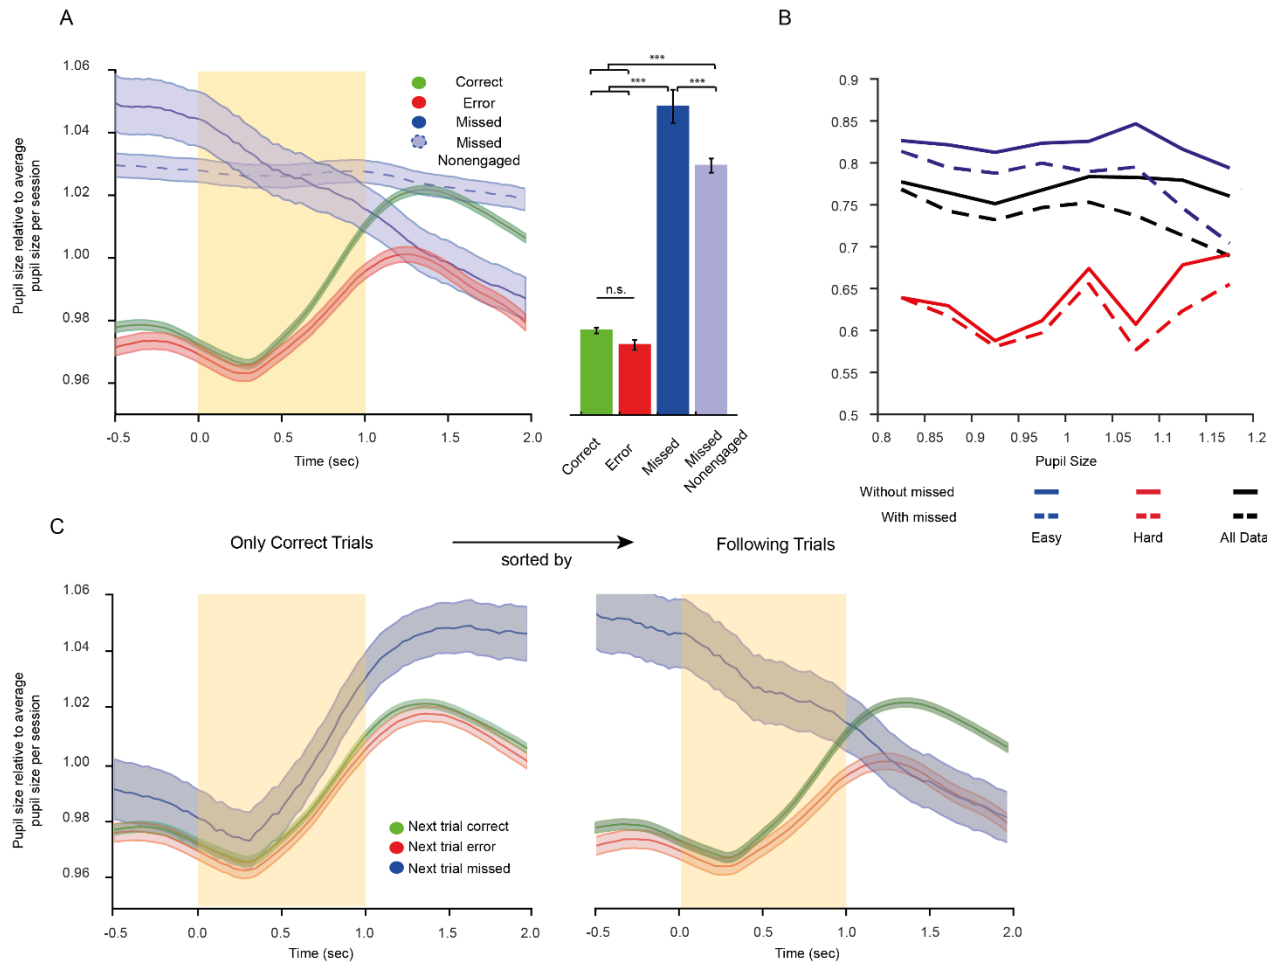

**Figure 2. Pre-stimulus pupillary size of mice performing a 2-AFC task reflects task engagement state and holds no information regarding subsequent performance.**

A) Left: Mean pupil size for the course of a trial, averaged over all trials and separated into correct trials, error trials, miss trials and miss trials during the non-attentive period at the end of the session. Right: Mean Pupil size for the pre-stimulus period (baseline). Error bars show the standard error of the mean. B) Performance over all animals and trials in dependence of baseline pupil size. The baseline pupil size was defined as the mean of the time period before the stimulus. The performance was calculated for three groups: all trials, hard trials and easy trials. Hard trials included all trials with a distractor bigger than 30 Hz, whereas easy trials were defined as trials with a distractor of 30 Hz or smaller.

Furthermore, each group was again separated into performance including miss trials (dotted lines) or performance without miss trials (solid lines). C) The curves show the history dependency of the pupil size using the example of rewarded trials and trials following rewarded trials. Left: Only rewarded (correct) trials are shown. The trials are separated by the outcome of the following trial. Right: Trials following rewarded (correct) trials. The trials are separated by the outcome of the trial.

average baseline levels again already after a single miss trial (Fig. 2C). In order to test whether the baseline period holds information regarding task performance, animal performance was analyzed in respect to baseline pupil size

(Fig 2B) restricted to attentive conditions. When baseline pupil size is observed as a function of performance over all trials including miss response trials, performance is constant for small and medium baseline pupil size but drops for above average pupil size resulting in a significant negative correlation (Fig 2B, black dashed line;  $r_{\tau}=-0.571$ ,  $p=0.03$ ). However, this effect might be mediated solely by miss trials which have a larger baseline pupil size overall. Indeed, when performance is observed solely for the engaged state excluding miss trials, it does not drop as a function of baseline pupil size (Fig 2B, black solid line;  $r_{\tau}=0.071$ ,  $p=0.640$ ). As such, baseline pupillary trace seems to hold no perceptual information regarding task performance (engaged state) or optimal task performance. In addition, we observed no effect of task difficulty over this phenotype when tested for a negative correlation for easy tasks or positive correlation for hard tasks (Fig 2B, blue and red;  $r_{\tau \text{ easy all data}}=-0.572$ ,  $p=0.031$ ;  $r_{\tau \text{ easy without miss}}=0.214$ ,  $p=0.274$ ;  $r_{\tau \text{ hard all data}}=0.071$ ,  $p=0.274$ ;  $r_{\tau \text{ hard without miss}}=0.357$ ,  $p=0.137$ ), with performance level dropping overall per difficulty level but remaining constant as a function of baseline pupil size.

*Pupillary dilation transients of mice performing a 2-AFC task differ depending on animal response and reflect response confidence.*

Thus, to observe perceptually related task responses as reflected by the pupil, the pupillary dilation transient was baselined relative to the pre-stimulus period, resulting in a pupillary dilation transient that reflects the perceptual content of the information withheld by the pupil. We observed a significant difference between pupillary dilation transients for the three different response types (Fig 3A;  $F(2,19396)=1272.84$ ,  $p<0.001$ ). Pupil dilation transients for the disengaged state remained principally unchanged following whisker stimulation and revealed only a late ( $\sim 700\text{ms}$ ) and barely noticeable pupillary response ( $M_{(\text{miss})}=4.065\pm 0.076$ ). Contrary to this, pupillary dilation transients for the engaged state, showed a faster ( $\sim 330\text{ms}$ ) and increased response following stimulation onset, for both correct ( $M_{(\text{correct})}=9.957\pm 0.055$ ) and error ( $M_{(\text{error})}=8.799\pm 0.095$ ) with correct responses showing a larger pupillary response magnitude than error responses (Fig 3A). This observed difference between the pupillary dilation transients for correct and error responses might have an underlying dependency of response time (RT) distribution, reflecting varying confidence in the response or decisions which might differ between very early responses to late responses. RT distribution analysis for correct and error responses (Fig 3B) shows that the two distributions diverge from one another for early responses ( $<150\text{ms}$ ), with error responses being more prominent



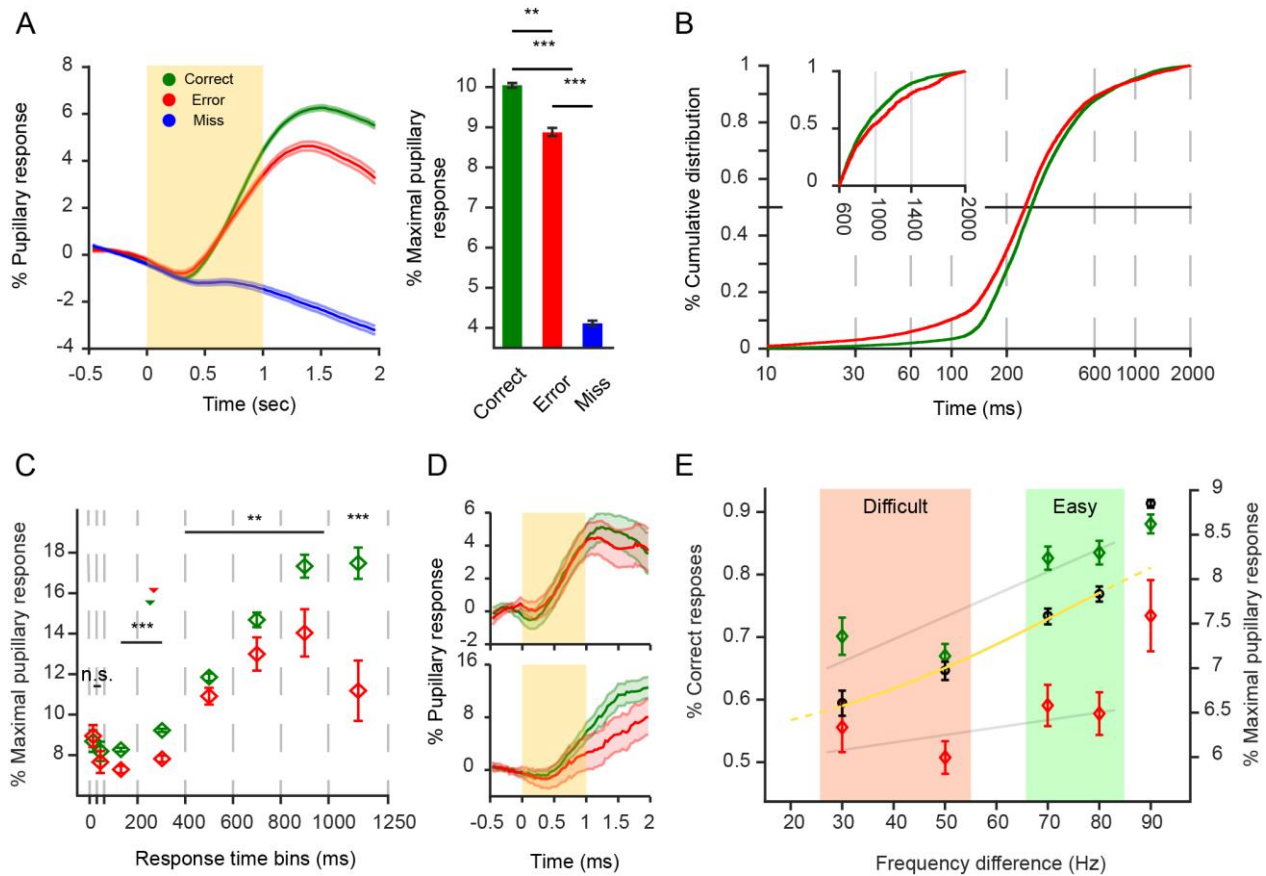

Figure 3. Pupillary dilations of mice performing a 2-AFC task differ depending on animal response and task difficulty reflecting response confidence.

(A) *left* - Pupil dilation transients for mice performing a 2-AFC task (N=8 mice; n=92 sessions) normalized relative to baseline period for correct (green), error (red) and miss (blue) responses. *right* - Pupil response magnitude following stimulus onset for the different response types. (B) CDF plot comparing the response time distribution for correct (green) and error (red) responses. inset - magnification of CDF for responses following 600ms. (C) Pupil response magnitude for different RT time bins for correct (green) and error (red) responses. Dashed vertical lines represent time bins used for averaging pupil response magnitude. First and second bin 0-30ms and 30-60ms respectively. Median response time represented by triangles for correct (green - 264ms) and error (red - 260ms) responses. (D) Example pupillary dilation traces for correct (green) and error (red) responses in two response time bins. *top* - 0-30ms RT bin. *bottom* - 1000-1250ms RT bin. (E) Decrease in pupil response magnitude correlates with decrease in animal performance as difficulty increases for performance in a 2-AFC discrimination task for correct (green) responses but not for error (red) responses. Black circles are average performance across mice with logistic fit (yellow). Grey lines represent linear fit for discrimination task. Yellow rectangle represents stimulus.

in this interval and correct responses being slightly more prominent than error ones for late responses (>800ms). This indicates that mice performing the 2-AFC task provide more error responses for early RTs and make relatively

more correct responses for late RTs. Hence, we wanted to observe whether the pupillary response diverges between correct and error responses as a function of when the RT is provided, by observing the pupillary response magnitude in different RT bins. Analysis revealed a significant difference between pupillary response magnitude for correct and error responses per different RT bins (Fig 3C;  $F(15,18068)=112.43$ ,  $p<0.001$ ). However, there is no difference between the pupillary response magnitude of correct and error responses for very early responses (see also figure 3D top), when provided in the first 60 milliseconds ( $M_{(\text{correct},0-30\text{ms})}=8.685\pm0.533$ ;  $M_{(\text{error},0-30\text{ms})}=8.949\pm0.552$ ;  $M_{(\text{correct},30-60\text{ms})}=8.188\pm0.518$ ;  $M_{(\text{error},30-60\text{ms})}=7.658\pm0.575$ ). Importantly, this shows that the observed difference for the pupillary dilation transient between correct and error responses is not purely due to the difference in reward attainment or motor output. For RT bins where there is no divergence in the relative RT distributions (60-800ms) the pupillary response magnitude increases as a function of the increase in RT with pupillary response magnitude being larger for correct responses than for error throughout all bins ( $M_{(\text{correct},60-200\text{ms})}=8.268\pm0.104$ ;  $M_{(\text{error},60-200\text{ms})}=7.287\pm0.175$ ;  $M_{(\text{correct},200-400\text{ms})}=9.223\pm0.083$ ;  $M_{(\text{error},200-400\text{ms})}=7.817\pm0.165$ ;  $M_{(\text{correct},400-600\text{ms})}=11.852\pm0.169$ ;  $M_{(\text{error},400-600\text{ms})}=10.911\pm0.369$ ;  $M_{(\text{correct},600-800\text{ms})}=14.682\pm0.292$ ;  $M_{(\text{error},600-800\text{ms})}=12.994\pm0.646$ ). For late RT bins (>800ms) this phenotype is altered, with the pupillary response magnitude for correct responses continuing to increase while the response magnitude for error trials not increasing further (see also figure 3D bottom) ( $M_{(\text{correct},800-1000\text{ms})}=17.332\pm0.405$ ;  $M_{(\text{error},800-1000\text{ms})}=14.037\pm0.838$ ;  $M_{(\text{correct},1000-1250\text{ms})}=17.480\pm0.463$ ;  $M_{(\text{error},1000-1250\text{ms})}=11.181\pm0.894$ ). This shows the maintained confidence coding underlying the RT distribution. In addition to any RT underlying influences on the pupillary transients, we hypothesized that there might also be a task difficulty effect. As the difference between target stimulus and distractor stimulus decreases, it becomes more difficult to discriminate between the two simultaneously presented stimuli and solve the task. Indeed, this effect is seen in the average psychometric response curve for all mice (Fig 3E). Performance was highest for the detection task ( $91.3\pm0.6\%$  correct responses) and dropped with increasing the frequency of the distractor, reaching near chance levels ( $59.4\pm2.0\%$  correct responses). This enabled us to observe pupillary response magnitude relative to task difficulty as experienced by the animals. This decrease in performance correlates with a decrease in the pupillary response magnitude for correct responses but not with error responses which remain constant as a function of difficulty level for the discrimination task (Fig 3E;  $r_{\text{T correct}}=0.388$ ,  $p<0.001$ ;  $r_{\text{T error}}=0.003$ ,  $p=0.402$ ). Hence, as performance drops to chance levels the pupillary response magnitude for correct

and error trials tends to converge, indicating that when choice is random pupillary dilation becomes similar.

*Pupillary transients in a delayed response 2-AFC detection task reflect response confidence but mainly encode motor output.*

Due to the slow kinetics of the pupillary response, it is possible that any perceptual response reflected by the pupil in the period between presentation of the stimulus and RT would not be observed due to task design (temporal separation between stimulus and RT). In order to determine if such pupillary perceptual representations of the task do occur during this period, we tracked the pupil of mice performing a delayed response detection task with the water spouts being presented after a delay period following stimulus onset (1000, 1500 or 2000ms delay). Pupillary dilation traces for both correct and error responses began increasing following stimulation (Fig 4 A-C), showing a significant difference between the pupillary dilation trace for correct, error and miss responses already before the animal provided its response to the task ( $F(2,968)_{1000\text{ms}}=25.06$ ,  $p<0.001$ ;  $F(2,2247)_{1500\text{ms}}=76.66$ ,  $p<0.001$ ;  $F(2,2279)_{2000\text{ms}}=32.08$ ,  $p<0.001$ ). This increased pupillary dilation trace for correct and error responses was maintained throughout the stimulus – RT interval (1000ms:  $M_{\text{correct}}=3.446\pm 0.222$ ;  $M_{\text{error}}=2.448\pm 0.470$ ;  $M_{\text{miss}}=0.757\pm 0.254$ ; 1500ms:  $M_{\text{correct}}=4.691\pm 0.221$ ;  $M_{\text{error}}=3.494\pm 0.295$ ;  $M_{\text{miss}}=-0.183\pm 0.275$ ; 2000ms:  $M_{\text{correct}}=3.446\pm 0.222$ ;  $M_{\text{error}}=2.202\pm 0.223$ ;  $M_{\text{miss}}=-0.057\pm 0.346$ ). Following the RT of the animal, pupillary responses exhibited a second and more pronounced, significant increase in pupillary dilation ( $F(2,968)_{1000\text{ms}}=70.73$ ,  $p<0.001$ ;  $F(2,2247)_{1500\text{ms}}=139.52$ ,  $p<0.001$ ;  $F(2,2279)_{2000\text{ms}}=91.68$ ,  $p<0.001$ ) with correct trials still showing the largest pupil dilation and miss trials hardly any difference (1000ms:  $M_{\text{correct}}=8.562\pm 0.269$ ;  $M_{\text{error}}=6.816\pm 0.559$ ;  $M_{\text{miss}}=3.183\pm 0.275$ ; 1500ms:  $M_{\text{correct}}=10.690\pm 0.233$ ;  $M_{\text{error}}=9.710\pm 0.308$ ;  $M_{\text{miss}}=4.017\pm 0.252$ ; 2000ms:  $M_{\text{correct}}=10.200\pm 0.216$ ;  $M_{\text{error}}=9.353\pm 0.231$ ;  $M_{\text{miss}}=4.254\pm 0.320$ ). Average pupillary dilation trace for the disengaged state remained overall unchanged as in the un-delayed task, indicating the unresponsiveness of the pupil when mice are disengaged. For the engaged state, across all delay periods, the increase in delay and the pupillary response magnitude exhibited a positive correlation for both correct and error responses (Fig 4D;  $r_{\tau \text{ correct}}=0.541$ ,  $p<0.001$ ;  $r_{\tau \text{ error}}=0.436$ ,  $p<0.001$ ), indicating that the maximal pupillary dilation follows the RT and not the stimulation. For all delay periods, baseline pupillary size was larger for the disengaged state (miss condition) versus the active engagement state as in the un-delayed task, with baseline for correct and error not being significantly different (data not shown). The difference in pupillary dilation transients observed for correct and error responses

in the stimulus-RT interval (Fig 4A-C) reflects a stimulus based decision prior to RT.

Figure 4 - Pupillary dilations in a delayed 2-AFC detection task reflect response confidence but mainly encode motor output.

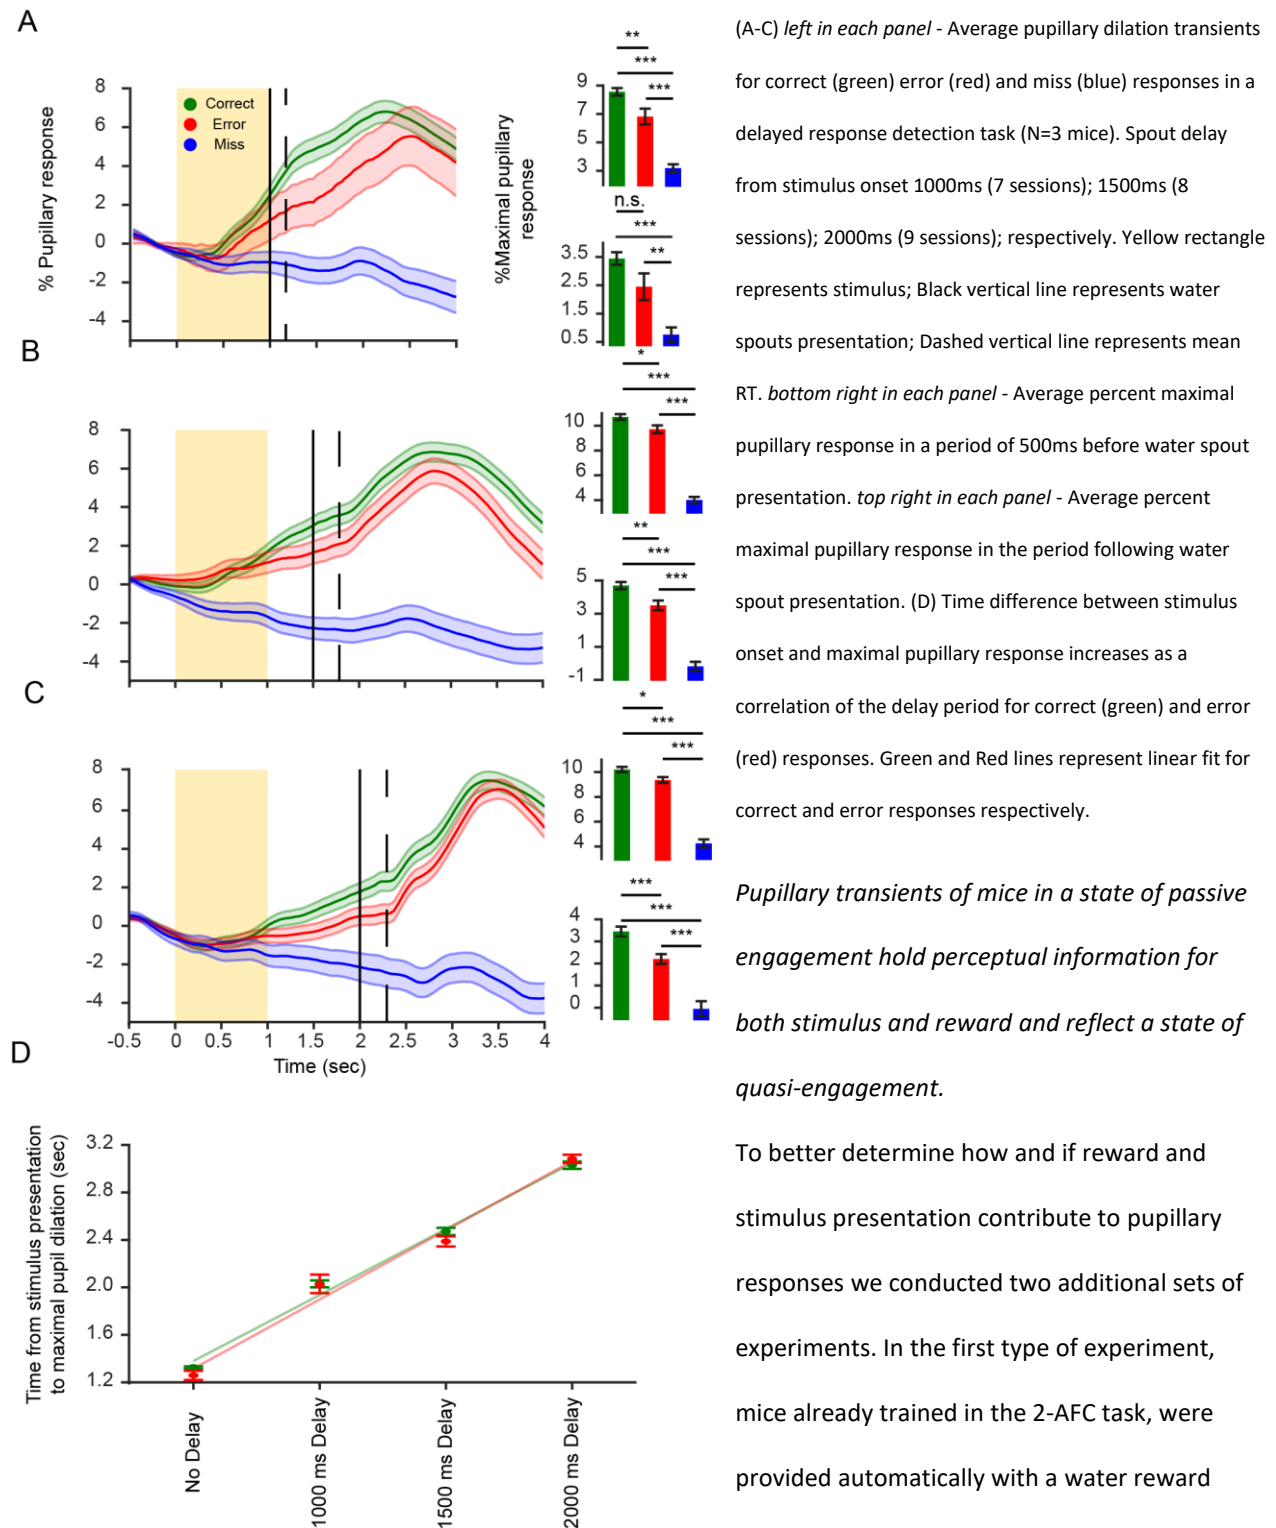

upon whisker stimulation (90 vs. 0Hz) in all trials for several sessions. In the second type of experiment, the same mice were now only provided with a water reward, without whisker stimulation, for several sessions, in order to observe whether there is a pupillary representation of the stimulation in addition to the reward. For both experiments the temporal sequence of the task was the same as in figure 1B. Hence, in both cases mice were passively engaged in the task, meaning they were responding to the presented reward without the requirement to solve a task to obtain it so that the whisker stimulation loses its task relevant meaning. When comparing the passive engagement states with correct responses provided in an active engagement state (as all three conditions contain the attainment of reward) there is a significant difference in pupillary response magnitudes between both passive engagement states and active engagement (Fig 5A;  $F(2,4788)=177.58$ ,  $p<0.001$ ). For passive engagement, the presentation of the *stimulus + reward* versus *reward only* elicited a significantly higher pupillary response magnitude ( $M_{(reward)}=4.346\pm0.158$ ;  $M_{(reward + stimulus)}=5.035\pm0.165$ ). This indicates that both stimulus and reward *per se* are encoded by the pupillary response. However, the pupillary response magnitude is higher when mice are actively engaged as in the *stimulus + reward* condition ( $M_{(active engagement)}=7.936\pm0.134$ ). Within passive engagement states there was a significant difference between engaged states, when mice responded to the reward and disengaged states, when mice did not respond to the reward (miss condition) (Fig 5B;  $F(3,2704)=20.29$ ,  $p<0.001$ ) with baseline pupillary size increased when mice were in a state of disengagement versus engagement, *stimulus + reward* condition ( $M_{engaged stimulus + reward}=0.985\pm0.003$ ;  $M_{disengaged stimulus + reward}=1.061\pm0.025$ ) and *reward only* condition ( $M_{engaged reward}=0.991\pm0.003$ ;  $M_{disengaged reward}=1.032\pm0.007$ ). Interestingly, when analyzing the pupillary response magnitude in different RT bins, there is a significant difference between the groups (Fig 5C;  $F(5,2034)=49.41$ ,  $p<0.001$ ). For early RTs (<60ms) the pupillary response magnitude for both passive engagement conditions is not significantly different ( $M_{reward}=5.409\pm0.445$ ;  $M_{reward + stimulus}=5.904\pm0.486$ ) but for responses provided around the median RT (*reward + stimulus*, 117ms; *reward only*, 159ms) for both conditions, the pupillary response magnitude is higher for *reward + stimulus* ( $M_{reward}=4.633\pm0.245$ ;  $M_{reward + stimulus}=5.734\pm0.247$ ), indicating the stimulus being perceived in the response decision period. For late RTs (200 – 400ms) the pupillary response magnitude is dropping sharply for both conditions and there is again no significant difference between the conditions ( $M_{reward}=1.471\pm0.268$ ;  $M_{reward + stimulus}=1.651\pm0.250$ ).

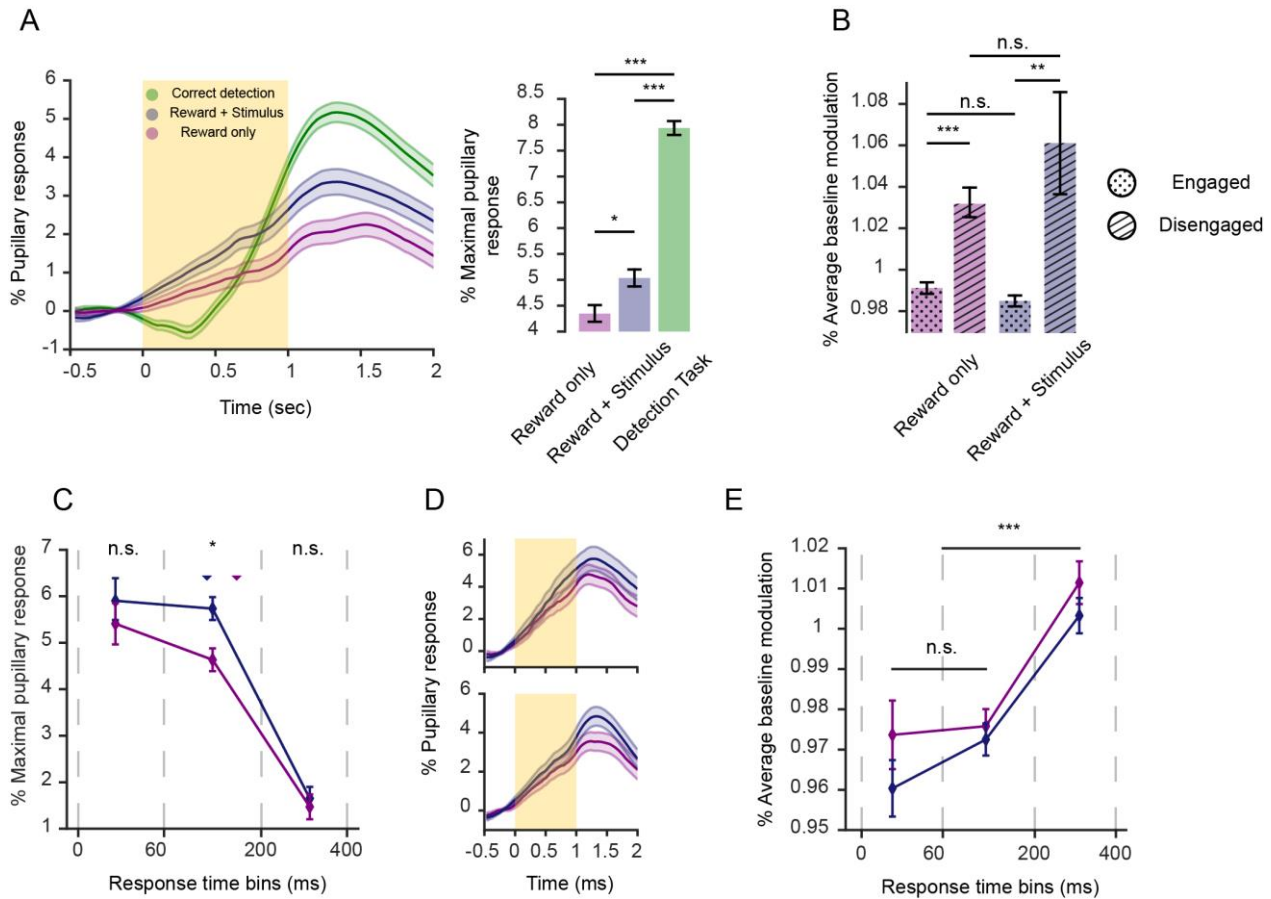

Figure 5. *Pupillary transients for a state of passive engagement hold perceptual information for both stimulus and reward reflecting a state of quasi-engagement.*

(A) Pupil dilation transient differs for states of active engagement versus passive engagement. *left* - Averaged transient of percent change in pupil size relative to baseline period, before stimulus onset/reward delivery, (N=3 mice) for reward only (purple; 1311 trials), reward + stimulus (blue; 1123 trials) and correct responses in a detection task (green; 2419 trials). *right* - Average maximal pupil size following stimulus onset/reward delivery for the different behavioral situations. (B) Average pupil size during baseline period before stimulus onset relative to average pupil size per session for the passive engagement states and their corresponding disengagement periods. (C) Pupil response magnitude for different RT time bins for reward only (purple) and reward + stimulus (blue). Triangles represent median RT for reward + stimulus (blue - 117ms) and reward only (purple - 159ms). (D) *top* - Pupillary dilation transients for RTs in the 0-60ms bin. *bottom* - pupillary dilation transients for RTs in the 60-200ms bin. (E) Maximal pupillary response as percent change from baseline for different RT bins shown for the passive engagement states reward only (purple) and reward + stimulus (blue). Vertical dashed lines show behaviorally relevant RT bins. Yellow rectangle represents stimulus.

This can be explained by observing baseline pupil size (Fig 4E) which is significantly different across time bins for both the *reward only* condition ( $F(2,1028)=15.84$ ,  $p<0.001$ ) and *reward + stimulus* condition ( $F(2,1006)=18.5$ ,

$p < 0.001$ ). Baseline pupil size remains small and is not significantly different for early and median RTs ( $M_{\text{reward } 0-60\text{ms}} = 0.974 \pm 0.008$ ;  $M_{\text{reward } 60-200\text{ms}} = 0.976 \pm 0.004$ ;  $M_{\text{reward + stimulus } 0-60\text{ms}} = 0.960 \pm 0.008$ ;  $M_{\text{reward + stimulus } 60-200\text{ms}} = 0.972 \pm 0.004$ ), indicating a state of engagement, but increases sharply for late RTs ( $M_{\text{reward } 200-400\text{ms}} = 1.011 \pm 0.005$ ;  $M_{\text{reward + stimulus } 200-400\text{ms}} = 1.003 \pm 0.004$ ), explaining the observed drop in the pupillary response magnitude, with the pupil becoming unresponsive to task occurrences as baseline pupil size increases due to a state of disengagement.

## **Discussion**

In mice, pupil size correlates with arousal (Reimer et al., 2014; Murphy et al., 2015a) indicated through locomotion (Mineault et al., 2016; Shimaoka et al., 2018) or surprise (Vinck et al., 2015). We show that under task performance, baseline pupil size is not directly an arousal marker but rather indicates engagement state. Pupil is smaller when engaged versus disengaged from task performance, as defined by lack of task responsiveness (Fig 2A). This disengagement state is also manifested by lack of pupil reactivity to stimulation, opposed to dilations under task engaged states (Fig 2A). The switch between engagement and disengagement occurs quickly, within single trial temporal resolution (Fig 2C). Overall, when disengaged, the pupil is not overtly coding task relevant occurrences. Further, arousal levels influence performance (McGinley et al., 2015; Schriver et al., 2018) manifested as a U-shaped relationship (Murphy et al., 2011). Though see (Kahneman and Beatty, 1967; Beatty, 1982a; Karatekin et al., 2007). However, we observed a different phenotype. When analyzing baseline pupil size in relation to task performance, performance was better for small and mid-range pupil sizes but dropped for larger sizes that tend to relate with disengagement. Importantly, performance remained steady when excluding miss trials and observing engaged states only (Fig 2B). Indicating the performance drop results from miss responses not varying arousal. Still, it is possible that arousal changes across sessions affect performance as function of difficulty. However, we found no evidence for such effect. The discrepancy between previously reported results and ours, might be due to response categorization of the Go/noGo task, where perceptual failure and disengagement or lack of motivation are undistinguishable or due to different cognitive requirements imposed by the 2-AFC task. Also, under low light conditions, which previous studies used, parasympathetic inputs to the pupil are absent as opposed to ambient

light used in the present study, where sympathetic activity still exist (Steinhauer et al., 2004). Hence, we conclude that baseline pupil size, holds no information for optimal performance, perceptually relevant occurrences or specific task related processing. Pupil size rather reflects only engagement or disengagement states, not a general state of arousal in the presented behavioral task.

Under engagement states, dilations are observed following stimulation, with larger dilations for correct responses versus errors (Fig 3A). In terms of trial variables, this difference might arise due to reward (Lee and Margolis, 2016). Pupil related RT analysis revealed that for impulsive, non-stimulus induced responses, at short latency after stimulation (Carpenter and Williams, 1995; Mayrhofer et al., 2012), we observed no significant differences between correct-error dilations (Fig 3C). Thus, the correct-error dilation difference may not originate from reward *per-se* or motor responses. This would result in a difference between transients that is not RT dependent. As all other task occurrences are maintained constant, this difference would rather reflect a stimulus dependent decision component. Such representations of pupillary reflected decisions, in humans, include prediction error (Preuschoff et al., 2011; Braem et al., 2015; Urai et al., 2017), reward anticipation (Chiew and Braver, 2013) and response confidence (Lempert et al., 2015). Our results are not in line with prediction error representations, this would imply increased dilation for mistakes and a correct-error difference also for early RTs, since non-evidence based prediction should be the same, but the reward outcome differs. Increased coding for correct responses can be explained by response confidence representation as, for trained animals, responses leading to a correct outcome should be supported by higher choice confidence. Indeed, our findings support this idea. First, confidence coding is supported by the early RT results, as response confidence would be equal or irrelevant when responses are random and not evidence based. Correct-error dilations both continue to increase with increased RT latency (Fig 3C) indicating response confidence is maintained by the network underlying the pupillary dilations until RT. However, the proportional correct-error dilation increase is not maintained for late RTs, dilation increasing for correct but not error responses. RT distribution analysis for late correct-error responses shows that at these RTs there is a relative tendency for less error responses (Fig 3B). Taken together, confidence is maintained throughout for correct responses as function of RT, explained by the continued dilation increase, but for late occurring responses confidence for error responses is overall lower, exemplified by lower number of late error responses and the plateau for late error dilations. Importantly, response confidence pupillary coding is also reflected by dilations in



respect to task difficulty. Increased response confidence exhibited as larger dilation for easier tasks but dropping with higher difficulty (Fig 3E). Finally, as difficulty would increase, leading to performance dropping to chance levels, correct-error dilations would converge. Because response confidence, when guessing, would be the same. Additionally, if dilations code for response confidence, this should be observed also in the post-stimulus pre-RT period (Lak et al., 2017). Due to the temporal task profile, we addressed this by conducting a delayed-response task that separates decision components from motor responses. Transients contained two distinct periods (Fig 4A-C). One, a slow dilation following stimulation, and a second, more pronounced dilation following response. As the first period exhibits the correct-error difference this would reflect a decision related component of response confidence. The second dilation locked to RT, relates to motor response. In support of confidence coding, a recent study (Lak et al., 2017) linked response confidence with the dopaminergic system. Indeed, LC modulates dopaminergic activity in both Ventral Tegmental Area (VTA) and Substantia Nigra (Grenhoff et al., 1993; Zhu, 2018) and VTA afferents innervate LC (Ornstein et al., 1987). It is conceivable that confidence coded by the dopaminergic system is reflected through dilations either by LC activation of dopaminergic loci or prefrontal cortex feedback arising from these interconnected systems (Arnsten and Goldman-Rakic, 1984; Sara and Hervé, 1995; Jodo et al., 1998). The behavioral state or task demands may well influence what the pupil reflects based on what the underlying network enhances or is directed towards. As such, we tested the behavioral condition when animals are still in a state of engagement but without a task-solving related cognitive requirement to attain reward. A condition we refer to as passive engagement. Importantly, mice were accustomed to the experimental setup and had high task performance (>90%) to minimize effects of surprise or anxiety. Under these conditions, dilations were smaller versus correct responses under active engagement, even though external experience was the same (stimulation and reward) (Fig 5A). In addition, when both reward and stimulation were presented, the dilation was increased compared to when only a reward was presented, indicating that under passive engagement both reward and stimulus are reflected by the pupil. For relating stimulus coding as a cognitive variable, it has been previously reported that LC neurons exhibit a small early component which is stimulus related (Rajkowski et al., 2004). Thus, when actively engaged in task performance the pupil dilation is dominated by internal decision variables as response confidence but under passive engagement what dominates the dilation is a passive reflection of external occurrences. Further, this passive engagement state seems to reflect an underlying state of attention switching.

Contrary to active engagement, where pupil size increases together with RT (Fig 5C), under passive engagement an opposite trend is observed, pupil size decreases as RT increases. This is explained by baseline pupil size, which has an opposite trend to the pupillary dilation (Fig 5C and E). Increased baseline pupil size and lack of pupil reactivity to task occurrences for late RTs, even though mice still responded to reward, show within trial disengagement and may reflect fluctuations of attention. The possibility of baseline pupil size to reflect task disengagement or within trial attention switches is also manifested by the observed history dependence of the responses under attentive miss condition (Fig 2C). This phenotype may relate to the LC adaptive gain theory and the exploration-exploitation modes (Aston-Jones and Cohen, 2005). Hence, when the stimulus has no cognitive function, attention quickly fluctuates from an exploitative mode, reflected by low baseline and pupillary reactivity to relevant occurrences, to an explorative mode where task occurrences are not coded, exhibited by increased baseline and low pupillary reactivity to the occurrence also correlating with LC activity (Aston-Jones et al., 1994; Aston-Jones et al., 1999; Usher et al., 1999; Clayton et al., 2004). This indicates that while mice are still behaviorally responsive they are already in a state of quasi-disengagement with pupil baseline size reflecting task attentiveness rather than mere arousal. Hence, the behavioral state and requirements posed by the environment are determining what the pupil reflects.

Taken together, our results provide further evidence for the complexity of what pupillary reactions reflect and support by proxy findings related to the LC-NE adaptive gain theory. When actively engaged with the task these dilations reflect task relevant decision representations of response confidence. Also, baseline pupil size reflects states of task engagement or attentiveness rather than general arousal. Finally, when in a state of passive engagement, pupillary dilations reflect external occurrences with animal state fluctuating between engaged and disengaged states, relating to fast fluctuation in attentiveness. The presented paradigm combined with pupillary measurements could be used in advantage of recording neural activity to better contextualize it with behavior and decipher network variables of confidence coding and perceptual decision making.

## **References**

Arnsten AF, Goldman-Rakic PS (1984) Selective prefrontal cortical projections to the region of the locus coeruleus and raphe nuclei in the rhesus monkey. *Brain Res.* 306:9-18.

Aston-Jones G, Rajkowski J, Kubiak P, Alexinsky T (1994) Locus Coeruleus neurons in monkey are selectively activated by attended cues in a vigilance task. *J Neurosci.* 14:4467-4480.

Aston-Jones G, Rajkowski J, Cohen J (1999) Role of locus Coeruleus in attention and behavioral flexibility. *Biol Psychiatry.* 46:1309-1320.

Aston-Jones G, Cohen JD (2005) An integrative theory of locus coeruleus-norepinephrine function: adaptive gain and optimal performance. *Annu Rev Neurosci.* 28:403-450.

Beatty J (1982) Phasic not tonic pupillary dilations response vary with auditory vigilance performance. *Psychophysiol.* 19:167-172.

Beatty J (1982) Task-evoked pupillary responses, processing load, and the structure of processing resources. *Psychol Bull.* 91:276-292.

Bradley MM, Miccoli L, Escrig MA, Lang PJ (2008) The pupil as a measure of emotional arousal and autonomic activation. *Psychophysiology.* 45:602-607.

Braem S, Coenen E, Bombeke K, van Bochove ME, Notebaert W (2015) Open your eyes for prediction errors. *Cogn Affect BehavNeurosci.* 15:374-380.

Chiew KS, Braver TS (2013) Temporal dynamics of motivation-cognitive control interactions revealed by high-resolution pupillometry. *Front Psychol.* 4:15.

Clayton EC, Rajkowski J, Cohen JD, Aston-Jones G (2004) Phasic activation of monkey locus ceruleus neurons by simple decisions in a forced-choice task. *J Neurosci.* 24:9914-9920.

de Gee JW, Knapen T, Donner TH (2014) Decision-related pupil dilation reflects upcoming choice and individual bias. *Proc Natl Acad Sci U S A*. 111:618-625.

de Gee JW, Colizoli O, Kloosterman NA, Knapen T, Nieuwenhuis S, Donner TH (2017) Dynamic modulation of decision biases by brainstem arousal systems. *Elife* 6.

Einhäuser W, Stout J, Koch C, Carter OL (2008) Pupil dilation reflects perceptual selection and predicts subsequent stability in perceptual rivalry. *Proc Natl Acad Sci U S A*. 105:1704-1709.

Einhäuser W, Koch C, Carter OL (2010) Pupil dilation betrays the timing of decisions. *Front Hum Neurosci*. 4:18.

Fiedler S, Glöckner A (2012) The dynamics of decision making in risky choice: an eye-tracking analysis. *Front Psychol*. 3:335.

Gilzenrat MS, Nieuwenhuis S, Jepma M, Cohen JD (2010) Pupil diameter tracks changes in control state predicted by the adaptive gain theory of locus coeruleus function. *Cogn Affect Behav Neurosci*. 10:252-269.

Grenhoff J, Nisell M, Ferré, Aston-Jones G, Svensson TH (1993) Noradrenergic modulation of midbrain dopamine cell firing elicited by stimulation of locus coeruleus in the rat. *J Neural Transm Gen Sect*. 93:11-25.

Hess EH, Polt JM (1960) Pupil size as related to interest value of visual stimuli. *Science*. 132:349-350.

Hess EH, Polt JM (1964) Pupil size in relation to mental activity during simple problem-solving. *Science*. 143:1190-1192.

Jodo E, Chiang C, Aston-Jones G (1998) Potent excitatory influences of prefrontal cortex activity on noradrenergic locus coeruleus neurons. *Neuroscience*. 83:63-79.

Joshi S, Li Y, Kalwani RM, Gold JI (2016) Relationship between pupil diameter and neuronal activity in locus coeruleus, colliculi, and cingulate cortex. *Neuron*. 89:221-234.

Kahneman D, Beatty J (1966) Pupil diameter and load on memory. *Science*. 154:1583-1585.

Kahneman D, Beatty J (1967) Pupillary responses in a pitch-discrimination task. *Perception & Psychophysics* 2:101-105.

Karatekin C, Marchus DJ, Couperous JW (2007) Regulations of cognitive resources during sustained attention and working memory in 10-year-olds and adults. *Psychophysiology*. 44:128-144.

Kloosterman NA, Meindertsma T, van Loon AM, Lamme VA, Bonnef YS, Donner TH (2015) Pupil size tracks perceptual content and surprise. *Eur J Neurosci* 41:1068-1078.

Lak A, Nomoto K, Keramati M, Sakagami M, Kepecs A (2017) Midbrain dopamine neurons signal belief in choice accuracy during a perceptual decision. 27:821-832.

Lee CR, Margolis DJ (2016) Pupil dynamics reflect behavioral choice and learning in a Go/NoGo tactile decision-making task in mice. *Front BehavNeurosci*. 10:200.

Lempert KM, Chen YL, Fleming SM (2015) Relating pupil dilation and metacognitive confidence during auditory decision-making. *PLoS One* 10.

Mayrhofer JM, Skreb V, von der Behrens W, Musall S, Weber B, Haiss F (2013) Novel two-alternative forced choice paradigm for bilateral vibrotactile whisker frequency discrimination in head-fixed mice and rats. *J Neurophysiol*. 109:273-284.

McGinley MJ, David SV, McCormick DA (2015) Cortical membrane potential signature of optimal states for sensory signal detection. *Neuron*. 87:179-192.

Mineault PJ, Tring E, Trachtenberg JT, Ringach DL (2016) Enhanced spatial resolution during locomotion and heightened attention in mouse primary visual cortex. *J Neurosci*. 36:6382-6392.

Murphy PR, Robertson IH, Balsters JH, O'Connell RG (2011) Pupillometry and P3 index the locus Coeruleus-noradrenergic arousal function in humans. *Psychophysiology*. 43:1532-1543.

Murphy PR, O'Connell RG, O'Sullivan M, Robertson IH, Balsters JH (2014) Pupil diameter covaries with BOLD activity in human locus coeruleus. *Hum Brain Mapp*. 35:4140-4154.

Murphy PR, Vandekerckhove J, Nieuwenhuis S (2014) Pupil-linked arousal determines variability in perceptual decision making. *PLoS Comput Biol* 10.

Ornstein K, Milon H, McRae-Degueurce A, Alvarez C, Berger B, Würzner HP (1987) Biochemical and radioautographic evidence for dopaminergic afferents of the locus coeruleus originating in the ventral tegmental area. *J Neural Transm.* 70:183-191.

Preuschoff K, 't Hart BM, Einhäuser W (2011) Pupil dilation signals surprise: evidence for noradrenaline's role in decision making. *Front Neurosci.* 5:115.

Reimer J, Froudarakis E, Cadwell CR, Yatsenko D, Denfield GH, Tolias AS (2014) Pupil fluctuations track fast switching of cortical states during quiet wakefulness. *Neuron.* 84:355-362.

Reimer J, McGinley MJ, Liu Y, Rodenkirch C, Wang Q, McCormick DA, Tolias AS (2016) Pupil fluctuations track rapid changes in adrenergic and cholinergic activity in cortex. *Nat Commun.* 7:13289.

Sara SJ, Hervé-Minvielle, A (1995) Inhibitory influence of frontal cortex on locus coeruleus neurons. *Proc Natl Acad Sci U S A.* 92:6032-6036.

Schrivier BJ, Bagdasarov S, Wang Q (2018) Pupil-linked arousal modulates behavior in rats performing a whisker deflection direction discrimination task. *J Neurophysiol.* doi: 10.1152/jn.00290.2018. [Epub ahead of print].

Shimaoka D, Harris KD, Carandini M (2018) Effects of arousal on mouse sensory cortex depend on modality. *Cell Rep.* 22:3160-3167.

Steinhauer SR, Siegle GJ, Condray R, Pless M (2004) Sympathetic and parasympathetic innervation of pupillary dilation during sustained processing. *Int. J. Psychophysiol.* 52:77-86.

Urai AE, Braun A, Donner TH (2017) Pupil-linked arousal is driven by decision uncertainty and alters serial choice bias. *Nat Commun.* 8:14637.

Usher M, Cohen JD, Servan-Schreiber D, Rajkowski J, Aston-Jones G (1999) The role of locus coeruleus in the regulation of cognitive performance. *Science.* 283:549-554.

Vinck M, Batista-Brito R, Knoblich U, Cardin JA (2015) Arousal and locomotion make distinct contributions to cortical activity patterns and visual encoding. *Neuron*. 86:740-754.

Wichmann FA, Hill NJ (2001) The psychometric function. I. Fitting, sampling and goodness of fit. *Percept Psychophys*. 63: 1293-1313.

Zhu MY (2018) Noradrenergic modulation on dopaminergic neurons. *Neurotox Res*. doi: 10.1007/s12640-018-9889-z. [Epub ahead of print].

## **Methods**

### ***Animals and Surgery***

For all experiments, male C57BL/6J mice were used (Charles River). Experiments were approved by North Rhein-Westphalia State Agency for Nature, Environment and Consumer Protection (Landesamt für Natur, Umwelt und Verbraucherschutz Nordrhein-Westfalen, LANUV) and conformed to ethical regulations of German Law for Protection of Animal Welfare. For surgery, mice were anesthetized with isoflurane in oxygen (3% induction, 1.5% maintenance; V/V) and body temperature was maintained at 37°C with a feedback-controlled heating pad. Analgesia (Buprenorphine; 0.1 mg/Kg) was injected S.C. The fur over the skull was removed and the skin was incised using a scalpel. Several drops of a local analgesia agent (Bupivacaine; 0.25%; Actavis New Jersey, United States) were used for the incision area. Connective tissue was removed and a bonding agent (DE Healthcare Products) was applied over the bone and polymerized with blue light. Next, blue light polymerizing dental cement (DE Healthcare Products) was used to attach a titanium head bar to the skull. Finally, the skin was sutured around the dental cement cap. An antibacterial ointment (Gentamicin) was applied over the surgery area and antibiotics were added to the drinking water of the animals (Baytril; 25 mg/ml). Animals were monitored and allowed a week of recovery before training commenced, with food and water *ad libitum*. Mice were housed separately and maintained under an inverted 12 hours light cycle regime.

### ***Behavior procedure and setup***

Mice were trained to perform a vibrotactile 2-AFC task (Mayrhofer et al. 2013). Briefly, upon commencement of training mice were subjected to a water deprivation regime during weekdays, receiving 1 ml of water per training day and water *ad libitum* during weekends. Weight was monitored daily throughout the water deprivation period. If a loss of over 20% body weight was observed compared to the non-deprived weekend days, water was supplemented. Mice were handled and acclimatized to the experimenter for one week. After acclimatization, mice were head fixed for increasing periods of time until able to receive 1 ml of water while head fixed. Once mice attained this stage, they were placed in the setup and behavioral training on the detection task began. In general, for the 2-AFC task mice had to detect a target stimulus (90Hz) from two simultaneous bilateral frequencies (for detection distractor was 0Hz, and later for discrimination 10, 20 40 or 60Hz). Target was randomly delivered to the left or right C1 whisker with mice having to report the side the target was presented on by licking on one of two



corresponding left or right water spouts placed in front of them (Fig 1A). Responses to the task were classified under four categories: correct response with mice being rewarded a water drop delivered through the corresponding spout, error response where no water was rewarded, miss when the animal did not respond with a lick within the decision period window, with no water being rewarded or a double-lick when mice licked both spouts within a 60ms period with no water being rewarded. The temporal structure of each trial consisted of a 1 second stimulus presented 1.5 seconds following trials start, with a response window of 2 seconds after stimulus initiation. Inter-trial interval was set as 2 seconds after the response of the animal or end of decision period with a 50 % maximal temporal jitter (Fig 1B). Once mice attained a performance of 85% correct responses per session in the detection task, discrimination training commenced. Mice were head fixed and placed on a wheel to monitor locomotion, C1 whiskers were stimulated with a piezo bending actuator (Johnson Matthey, Royston, UK) amplified by a piezo controller (MDT693A; Thorlabs, USA). Whisker stimuli consisted of one second long repetitive pulses (single-period 120 Hz cosine wave) with a maximum deflection amplitude of 400  $\mu\text{m}$ . Stimulation frequency was modulated by changing inter-pulse time intervals. Lick detection was conducted by capacitive water spouts connected to an Arduino platform (Arduino UNO Rev3; Arduino, Italy). Water delivery was controlled by solenoid valves (Bürkert, Ingelfingen, Germany). For the *delayed response detection task* water spout movement was controlled by servo electric motors (Savöx, Taiwan), following a determined delayed period after stimulus initiation. Control of the behavioral sessions and behavioral data analysis were conducted with custom written LabVIEW (National Instruments, RRID:SCR\_014325) and MATLAB software (MathWorks, RRID:SCR\_001622).

### ***Locomotion***

To monitor for locomotion, mice were placed on a Polystyrene (Styrodur®) wheel, 20 cm diameter, and movement was tracked using an optical incremental encoder (Optischer miniature encoder 2400; Kübler, Germany).

Locomotion was determined as movement  $>5$  cm/sec during the duration of the trial.

### ***Pupil imaging and detection***

Images were acquired using a Point Grey Chameleon3 camera (Point Grey Research) at 30 FPS with a 50 mm lens with the pupil illuminated by an IR led. Throughout the behavioral session, the setup was maintained under constant white light illumination, with the pupil in a dynamic range. Pupil movies were recorded separately for each trial (15 frames for baseline). For image acquisition, a custom written LabVIEW software (National

Instruments, RRID:SCR\_014325) was used and pupil detection and fitting was conducted offline with custom written MATLAB software (MathWorks, RRID:SCR\_001622). For pupil detection a threshold was determined for each frame and the image converted to a binary image. The pupil was detected using a circle fitting algorithm that detects the mean [x,y] coordinates of the pupil in the binary image. For determining the validity of the detection, 20% random frames in each movie were visually analysed by the experimenter. The validity criterion was set as >98% fit for all non-blinking frames per session. As blinking results in a quick and sudden change in measured pupil size, a threshold for the differential of the pupil transient was used and trials where blinking was detected were removed from all subsequent analysis.

### **Data analysis**

#### **Behavioral data analysis**

Psychophysical response curves for each animal were analysed with a MATLAB tool box for psychophysical data analysis (psignifit version 2.5.6; see <http://bootstrap-software.org/psignifit>), which implements a maximum-likelihood method (Wichmann and Hill, 2001). We used a logistic function

$$\psi(x; \alpha, \beta, \gamma, \lambda) = \gamma + (1 - \gamma - \lambda)F(x; \alpha, \beta),$$

$$F(x; \alpha, \beta) = 1/(1 + \exp\left[\frac{\alpha - x}{\beta}\right])$$

to fit the data points (parameters:  $\alpha, \beta, \gamma = 0.5, \lambda[0 \ 0.2]$ ), and obtain the inflection point of the discrimination threshold and slopes. Confidence intervals to the response for each stimulus pair were computed based on a binomial distribution with a confidence level of 95%. Performance in the 2-AFC task was computed as:

$$\% \text{ Performance} = \frac{\text{correct responses}}{\text{correct responses} + \text{error responses}} \times 100$$

For figure 2B including miss condition performance was computed as:

$$\% \text{ Performance} = \frac{\text{correct responses}}{\text{correct responses} + \text{error responses} + \text{miss responses}} \times 100$$

All data used in this study consists of mice having a performance above 85% correct responses per session in the detection task.

### ***Pupil data analysis***

For comparing pupil dilations between animals and sessions, pupil diameter per data point in each session was divided by the average pupil size per that session, i.e. normalized pupil size. For determining the pupillary dilation transient per trial (change relative to pre-stimulus period), for each trial, the average pre-stimulus, normalized pupil size was calculated and subtracted from each normalized pupil size sample point, with the result divided by the average value of the pre-stimulus normalized pupil size. For quantifying the pupillary response, the maximal pupil dilation per trial was used, resulting in the maximal pupillary response.

### ***Experimental design and statistical analysis***

The experimental design for baseline period analysis (Fig 2) and post-stimulus analysis (Fig 3) consisted of 8 mice. Delayed response task (Fig 4) consisted of 3 mice and passive engagement task (Fig 5) consisted of 3 mice. For determining significance between the different conditions in the baseline period, pupil size was averaged per trial for the pre-stimulus period, referred to as average pupil size modulation, and a one-way ANOVA used across animals followed by a Tukey post hoc (multiple comparison) test. For determining significance between conditions of the post-stimulus pupillary response, the maximal pupil size following stimulus onset was used as a test variable, and this maximal pupillary response analysed using a one-way ANOVA across animals followed by a Tukey post hoc (multiple comparison) test. For correlations we used a one-sided Kendall rank coefficient for test statistic and a linear fit of the data was applied. Unless stated otherwise shaded error bars for the pupillary dilation transient represent 95CI and error bars represent SEM. Statistical analysis was conducted using MATLAB software (MathWorks, RRID:SCR\_001622).
